# Supplementary material
Source: MDPI journal article supplement (https://www.mdpi.com/2073-8994/8/11/123)
Supplement: s1 [file s1]

Supplementary Materials: A Longitudinal Study of Changes in Fluctuating Asymmetry with Age in Jamaican Youth

Brian G. Palestis and Robert Trivers

Values are standardized FA for separate traits. Means for the traits measured in all three sample years are indicated in bold for each age group.

**Table S1.** All Subjects, Both Sexes.

| **Trait** | **Age Group** | | | | | | | | | | | |
| --- | --- | --- | --- | --- | --- | --- | --- | --- | --- | --- | --- | --- |
| **5 to 10** | | | **11 to 15** | | | **16 to 22** | | | **Total** | | |
| **Mean** | **N** | **Std. Deviation** | **Mean** | **N** | **Std. Deviation** | **Mean** | **N** | **Std. Deviation** | **Mean** | **N** | **Std. Deviation** |
| **Digit 3** | **0.90** | 245 | 0.71 | **1.07** | 174 | 0.79 | **1.07** | 205 | 1.03 | 1.00 | 624 | 0.85 |
| **Digit 4** | **0.85** | 245 | 0.75 | **1.10** | 176 | 0.94 | **1.11** | 205 | 1.05 | 1.00 | 626 | 0.92 |
| **Digit 5** | **0.75** | 245 | 0.63 | **1.20** | 176 | 0.99 | **1.14** | 205 | 1.12 | 1.00 | 626 | 0.94 |
| **Wrist** | **0.78** | 243 | 0.64 | **1.28** | 176 | 0.86 | **1.02** | 211 | 0.78 | 1.00 | 630 | 0.78 |
| **Elbow** | **1.19** | 243 | 0.84 | **0.99** | 176 | 0.81 | **0.79** | 211 | 0.64 | 1.00 | 630 | 0.79 |
| **Ankle** | **0.45** | 233 | 0.53 | **1.13** | 176 | 0.99 | **1.49** | 212 | 1.21 | 1.00 | 621 | 1.04 |
| **Foot** | **0.44** | 232 | 0.51 | **1.20** | 176 | 1.09 | **1.46** | 212 | 1.13 | 1.00 | 620 | 1.03 |
| **Kneecap** | - | - | - | 0.99 | 139 | 1.20 | 1.00 | 212 | 0.77 | 1.00 | 351 | 0.96 |
| **Knee** | 0.58 | 232 | 0.82 | 0.54 | 41 | 0.54 | 1.70 | 169 | 1.54 | 1.00 | 442 | 1.26 |
| **Ear Height** | 0.94 | 245 | 0.75 | 0.80 | 41 | 0.59 | 1.14 | 169 | 0.88 | 1.00 | 455 | 0.79 |
| **Ear width** | - | - | - | 1.01 | 139 | 0.70 | 0.99 | 211 | 0.69 | 1.00 | 350 | 0.70 |

**Table S2.** Selected Subjects, Both Sexes.

| **Trait** | **Age Group** | | | | | | | | | | | |
| --- | --- | --- | --- | --- | --- | --- | --- | --- | --- | --- | --- | --- |
| **5 to 10** | | | **11 to 15** | | | **16 to 22** | | | **Total** | | |
| **Mean** | **N** | **Std. Deviation** | **Mean** | **N** | **Std. Deviation** | **Mean** | **N** | **Std. Deviation** | **Mean** | **N** | **Std. Deviation** |
| Digit 3 | **0.86** | 79 | 0.71 | **1.03** | 91 | 0.76 | **1.04** | 99 | 1.19 | 0.98 | 269 | 0.93 |
| Digit 4 | **0.93** | 79 | 0.81 | **1.12** | 91 | 0.82 | **1.11** | 99 | 1.08 | 1.06 | 269 | 0.92 |
| Digit 5 | **0.73** | 79 | 0.59 | **1.23** | 91 | 0.98 | **1.15** | 99 | 1.13 | 1.06 | 269 | 0.97 |
| Wrist | **0.84** | 79 | 0.69 | **1.37** | 91 | 0.88 | **0.98** | 99 | 0.78 | 1.07 | 269 | 0.82 |
| Elbow | **1.23** | 79 | 1.07 | **1.00** | 91 | 0.86 | **0.73** | 99 | 0.67 | 0.97 | 269 | 0.89 |
| Ankle | **0.56** | 79 | 0.68 | **1.21** | 91 | 1.00 | **1.51** | 99 | 1.25 | 1.13 | 269 | 1.09 |
| Foot | **0.42** | 79 | 0.47 | **1.14** | 91 | 1.05 | **1.31** | 99 | 1.05 | 0.99 | 269 | 0.99 |
| Kneecap | - | - | - | 0.99 | 73 | 1.38 | 0.99 | 99 | 0.82 | 0.99 | 172 | 1.09 |
| Knee | 0.59 | 79 | 0.87 | 0.41 | 19 | 0.47 | 1.83 | 79 | 1.60 | 1.12 | 177 | 1.38 |
| Ear Height | 0.91 | 79 | 0.77 | 0.82 | 19 | 0.54 | 1.17 | 79 | 0.97 | 1.02 | 177 | 0.85 |
| Ear width | - | - | - | 1.06 | 73 | 0.75 | 1.02 | 99 | 0.71 | 1.04 | 172 | 0.72 |

**Table S3.** All Males.

| **Trait** | **Age Group** | | | | | | | | | | | |
| --- | --- | --- | --- | --- | --- | --- | --- | --- | --- | --- | --- | --- |
| **5 to 10** | | | **11 to 15** | | | **16 to 22** | | | **Total** | | |
| **Mean** | **N** | **Std. Deviation** | **Mean** | **N** | **Std. Deviation** | **Mean** | **N** | **Std. Deviation** | **Mean** | **N** | **Std. Deviation** |
| **Digit 3** | **0.89** | 135 | 0.71 | **1.12** | 90 | 0.72 | **1.02** | 117 | 0.79 | 0.99 | 342 | 0.75 |
| **Digit 4** | **0.78** | 135 | 0.67 | **1.10** | 92 | 0.92 | **1.07** | 117 | 0.97 | 0.96 | 344 | 0.86 |
| **Digit 5** | **0.72** | 135 | 0.64 | **1.44** | 92 | 1.10 | **1.17** | 117 | 1.21 | 1.07 | 344 | 1.03 |
| **Wrist** | **0.78** | 135 | 0.55 | **1.30** | 91 | 0.90 | **1.03** | 119 | 0.78 | 1.00 | 345 | 0.76 |
| **Elbow** | **1.07** | 135 | 0.73 | **1.09** | 91 | 0.87 | **0.81** | 119 | 0.66 | 0.99 | 345 | 0.76 |
| **Ankle** | **0.47** | 130 | 0.57 | **1.23** | 91 | 1.00 | **1.53** | 120 | 1.24 | 1.05 | 341 | 1.07 |
| **Foot** | **0.45** | 130 | 0.55 | **1.23** | 91 | 1.05 | **1.48** | 120 | 1.16 | 1.02 | 341 | 1.05 |
| **Kneecap** | - | - | - | 1.08 | 73 | 1.35 | 1.08 | 120 | 0.80 | 1.08 | 193 | 1.04 |
| **Knee** | 0.57 | 129 | 0.87 | 0.41 | 19 | 0.42 | 1.46 | 97 | 1.40 | 0.91 | 245 | 1.18 |
| **Ear Height** | 0.89 | 135 | 0.73 | 0.73 | 19 | 0.51 | 1.10 | 97 | 0.94 | 0.96 | 251 | 0.81 |
| **Ear width** | - | - | - | 1.01 | 73 | 0.74 | 0.99 | 119 | 0.69 | 1.00 | 192 | 0.71 |

**Table S4.** Selected Males.

| **Trait** | **Age Group** | | | | | | | | | | | |
| --- | --- | --- | --- | --- | --- | --- | --- | --- | --- | --- | --- | --- |
| **5 to 10** | | | **11 to 15** | | | **16 to 22** | | | **Total** | | |
| **Mean** | **N** | **Std. Deviation** | **Mean** | **N** | **Std. Deviation** | **Mean** | **N** | **Std. Deviation** | **Mean** | **N** | **Std. Deviation** |
| **Digit 3** | **0.68** | 43 | 0.50 | **1.11** | 46 | 0.72 | **1.01** | 58 | 0.78 | 0.95 | 147 | 0.71 |
| **Digit 4** | **0.75** | 43 | 0.62 | **1.16** | 46 | 0.83 | **0.98** | 58 | 0.89 | 0.97 | 147 | 0.81 |
| **Digit 5** | **0.76** | 43 | 0.64 | **1.46** | 46 | 1.10 | **1.20** | 58 | 1.25 | 1.15 | 147 | 1.09 |
| **Wrist** | **0.89** | 43 | 0.61 | **1.42** | 46 | 0.90 | **0.99** | 58 | 0.75 | 1.09 | 147 | 0.79 |
| **Elbow** | **1.09** | 43 | 0.82 | **1.07** | 46 | 0.99 | **0.76** | 58 | 0.72 | 0.96 | 147 | 0.85 |
| **Ankle** | **0.65** | 43 | 0.81 | **1.47** | 46 | 1.09 | **1.51** | 58 | 1.24 | 1.25 | 147 | 1.14 |
| **Foot** | **0.45** | 43 | 0.54 | **1.30** | 46 | 1.03 | **1.42** | 58 | 1.11 | 1.10 | 147 | 1.03 |
| **Kneecap** | - | - | - | 1.05 | 37 | 1.69 | 1.04 | 58 | 0.84 | 1.04 | 95 | 1.24 |
| **Knee** | 0.65 | 43 | 1.11 | 0.45 | 10 | 0.51 | 1.52 | 48 | 1.41 | 1.04 | 101 | 1.30 |
| **Ear Height** | 0.83 | 43 | 0.65 | 0.61 | 10 | 0.36 | 1.11 | 48 | 1.08 | 0.94 | 101 | 0.88 |
| **Ear width** | - | - | - | 0.97 | 37 | 0.81 | 0.96 | 58 | 0.65 | 0.96 | 95 | 0.71 |

**Table S5.** All Females.

| **Trait** | **Age Group** | | | | | | | | | | | |
| --- | --- | --- | --- | --- | --- | --- | --- | --- | --- | --- | --- | --- |
| **5 to 10** | | | **11 to 15** | | | **16 to 22** | | | **Total** | | |
| **Mean** | **N** | **Std. Deviation** | **Mean** | **N** | **Std. Deviation** | **Mean** | **N** | **Std. Deviation** | **Mean** | **N** | **Std. Deviation** |
| **Digit 3** | **0.92** | 109 | 0.73 | **1.02** | 84 | 0.85 | **1.13** | 88 | 1.29 | 1.01 | 281 | 0.97 |
| **Digit 4** | **0.93** | 109 | 0.82 | **1.10** | 84 | 0.97 | **1.16** | 88 | 1.15 | 1.05 | 281 | 0.98 |
| **Digit 5** | **0.79** | 109 | 0.62 | **0.94** | 84 | 0.79 | **1.09** | 88 | 0.98 | 0.93 | 281 | 0.80 |
| **Wrist** | **0.79** | 107 | 0.75 | **1.27** | 85 | 0.83 | **1.00** | 92 | 0.77 | 1.00 | 284 | 0.80 |
| **Elbow** | **1.34** | 107 | 0.94 | **0.89** | 85 | 0.74 | **0.77** | 92 | 0.62 | 1.02 | 284 | 0.83 |
| **Ankle** | **0.43** | 103 | 0.48 | **1.01** | 85 | 0.98 | **1.45** | 92 | 1.19 | 0.94 | 280 | 1.01 |
| **Foot** | **0.43** | 102 | 0.47 | **1.17** | 85 | 1.13 | **1.43** | 92 | 1.09 | 0.98 | 279 | 1.02 |
| **Kneecap** | - | - | - | 0.90 | 66 | 1.01 | 0.90 | 92 | 0.72 | 0.90 | 158 | 0.85 |
| **Knee** | 0.59 | 103 | 0.76 | 0.66 | 22 | 0.61 | 2.01 | 72 | 1.67 | 1.12 | 197 | 1.35 |
| **Ear Height** | 1.00 | 109 | 0.77 | 0.86 | 22 | 0.66 | 1.20 | 72 | 0.78 | 1.06 | 203 | 0.77 |
| **Ear width** | - | - | - | 1.02 | 66 | 0.66 | 0.98 | 92 | 0.70 | 1.00 | 158 | 0.68 |

**Table S6.** Selected Females

| **Trait** | **Age Group** | | | | | | | | | | | |
| --- | --- | --- | --- | --- | --- | --- | --- | --- | --- | --- | --- | --- |
| **5 to 10** | | | **11 to 15** | | | **16 to 22** | | | **Total** | | |
| **Mean** | **N** | **Std. Deviation** | **Mean** | **N** | **Std. Deviation** | **Mean** | **N** | **Std. Deviation** | **Mean** | **N** | **Std. Deviation** |
| **Digit 3** | **1.06** | 36 | 0.86 | **0.95** | 45 | 0.80 | **1.08** | 41 | 1.62 | 1.03 | 122 | 1.15 |
| **Digit 4** | **1.14** | 36 | 0.96 | **1.07** | 45 | 0.82 | **1.29** | 41 | 1.28 | 1.16 | 122 | 1.03 |
| **Digit 5** | **0.70** | 36 | 0.54 | **1.00** | 45 | 0.79 | **1.08** | 41 | 0.94 | 0.94 | 122 | 0.79 |
| **Wrist** | **0.78** | 36 | 0.78 | **1.32** | 45 | 0.87 | **0.97** | 41 | 0.82 | 1.04 | 122 | 0.85 |
| **Elbow** | **1.40** | 36 | 1.30 | **0.93** | 45 | 0.70 | **0.69** | 41 | 0.58 | 0.99 | 122 | 0.93 |
| **Ankle** | **0.45** | 36 | 0.47 | **0.94** | 45 | 0.83 | **1.51** | 41 | 1.28 | 0.99 | 122 | 1.02 |
| **Foot** | **0.40** | 36 | 0.39 | **0.99** | 45 | 1.07 | **1.16** | 41 | 0.95 | 0.87 | 122 | 0.93 |
| **Kneecap** | - | - | - | 0.93 | 36 | 0.99 | 0.92 | 41 | 0.79 | 0.92 | 77 | 0.88 |
| **Knee** | 0.50 | 36 | 0.44 | 0.37 | 9 | 0.44 | 2.31 | 31 | 1.78 | 1.23 | 76 | 1.48 |
| **Ear Height** | 1.01 | 36 | 0.89 | 1.05 | 9 | 0.62 | 1.25 | 31 | 0.77 | 1.11 | 76 | 0.81 |
| **Ear width** | - | - | - | 1.16 | 36 | 0.68 | 1.10 | 41 | 0.79 | 1.13 | 77 | 0.73 |
